# Supplementary material
Source: Springer Nature journal article supplement (https://www.springermedizin.de/resource/supplementary/12879_2010_1412_MOESM4_ESM.pdf/9443184)

(a)

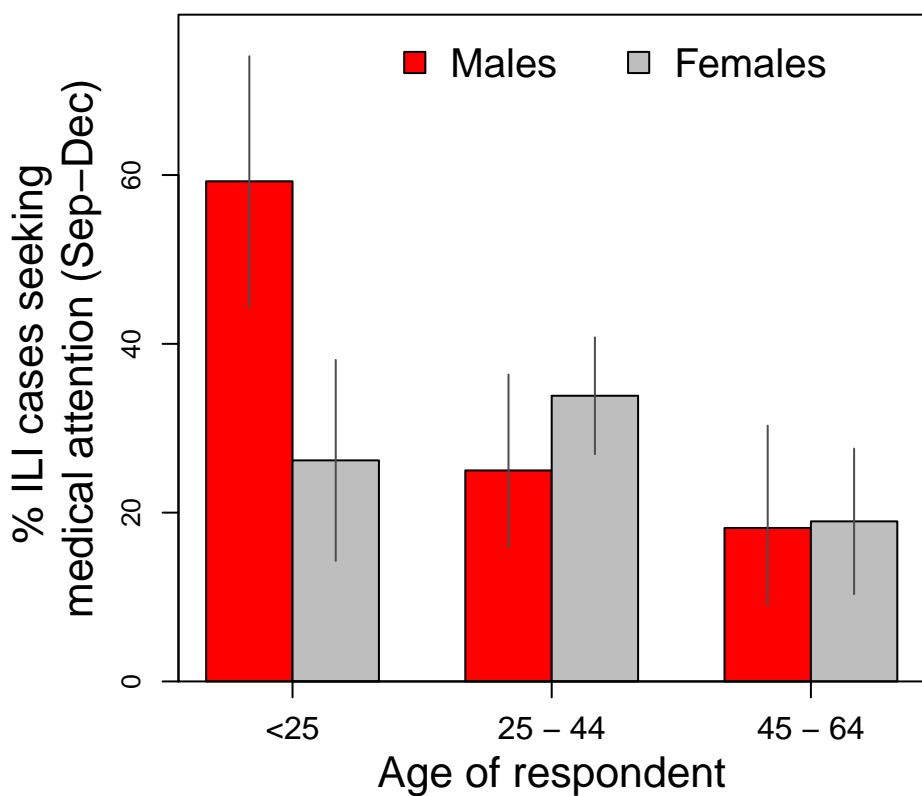

(b)

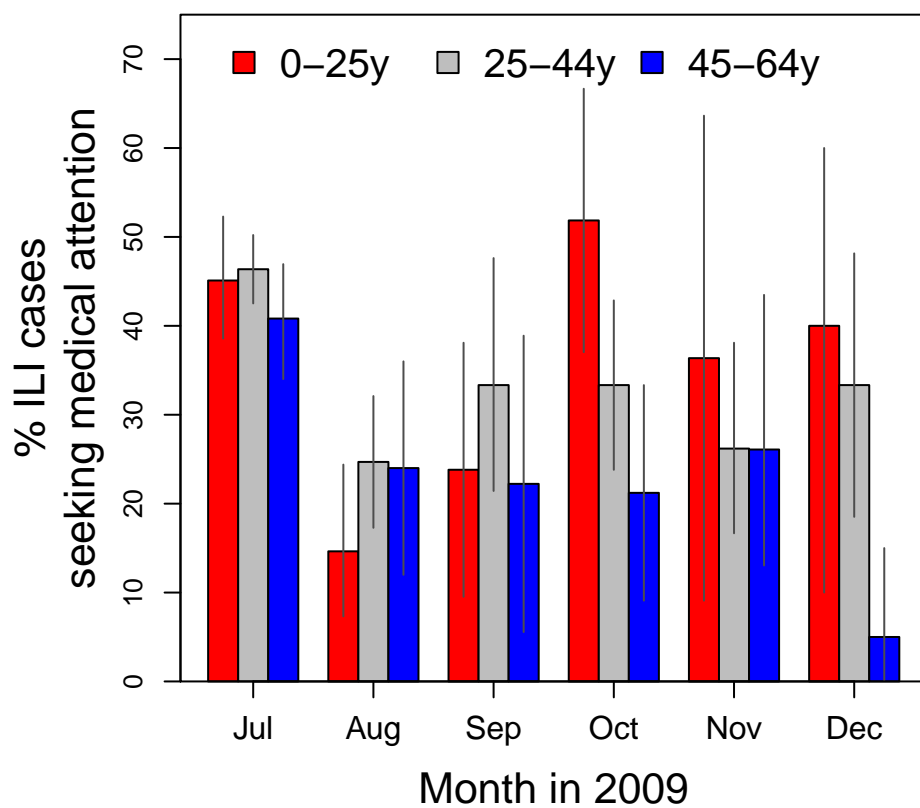

(c)

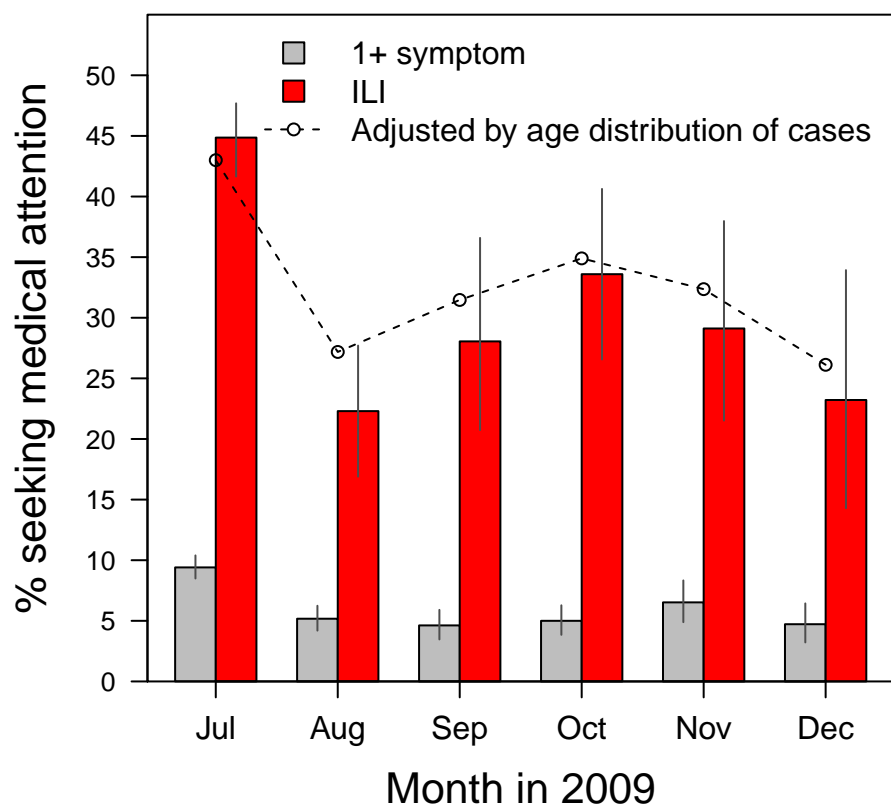

(d)

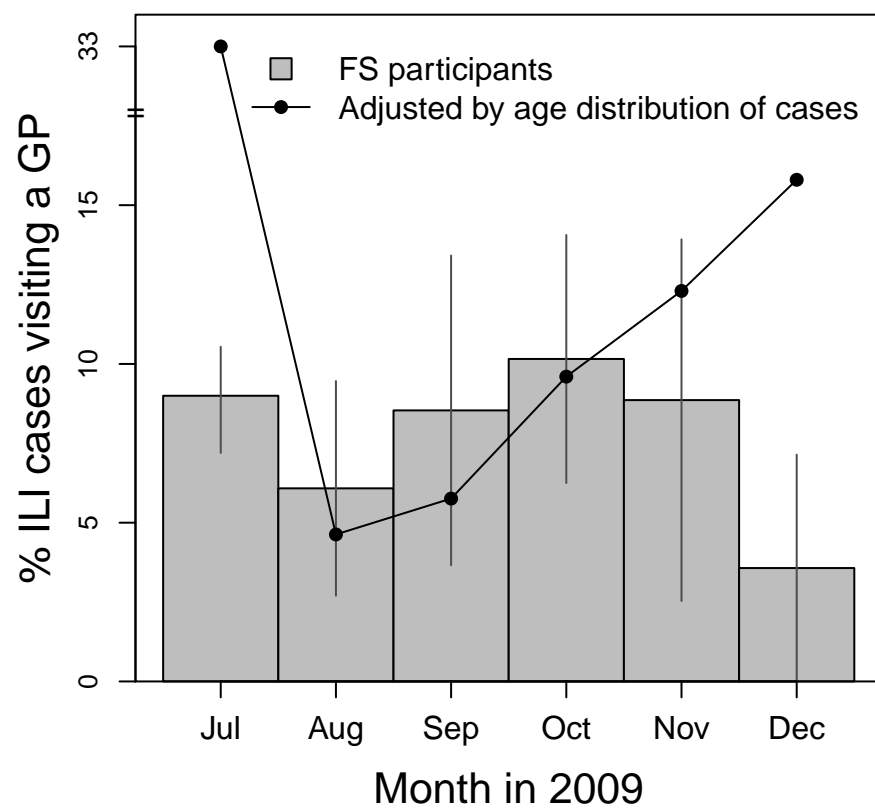

Supplement: MOESM4 [file 9443184]
